# Supplementary material
Source: publisher site journal article supplement (https://www.dovepress.com/article/343885)
Supplement: Supplementary file 1 [file get_supplementary_file.php]

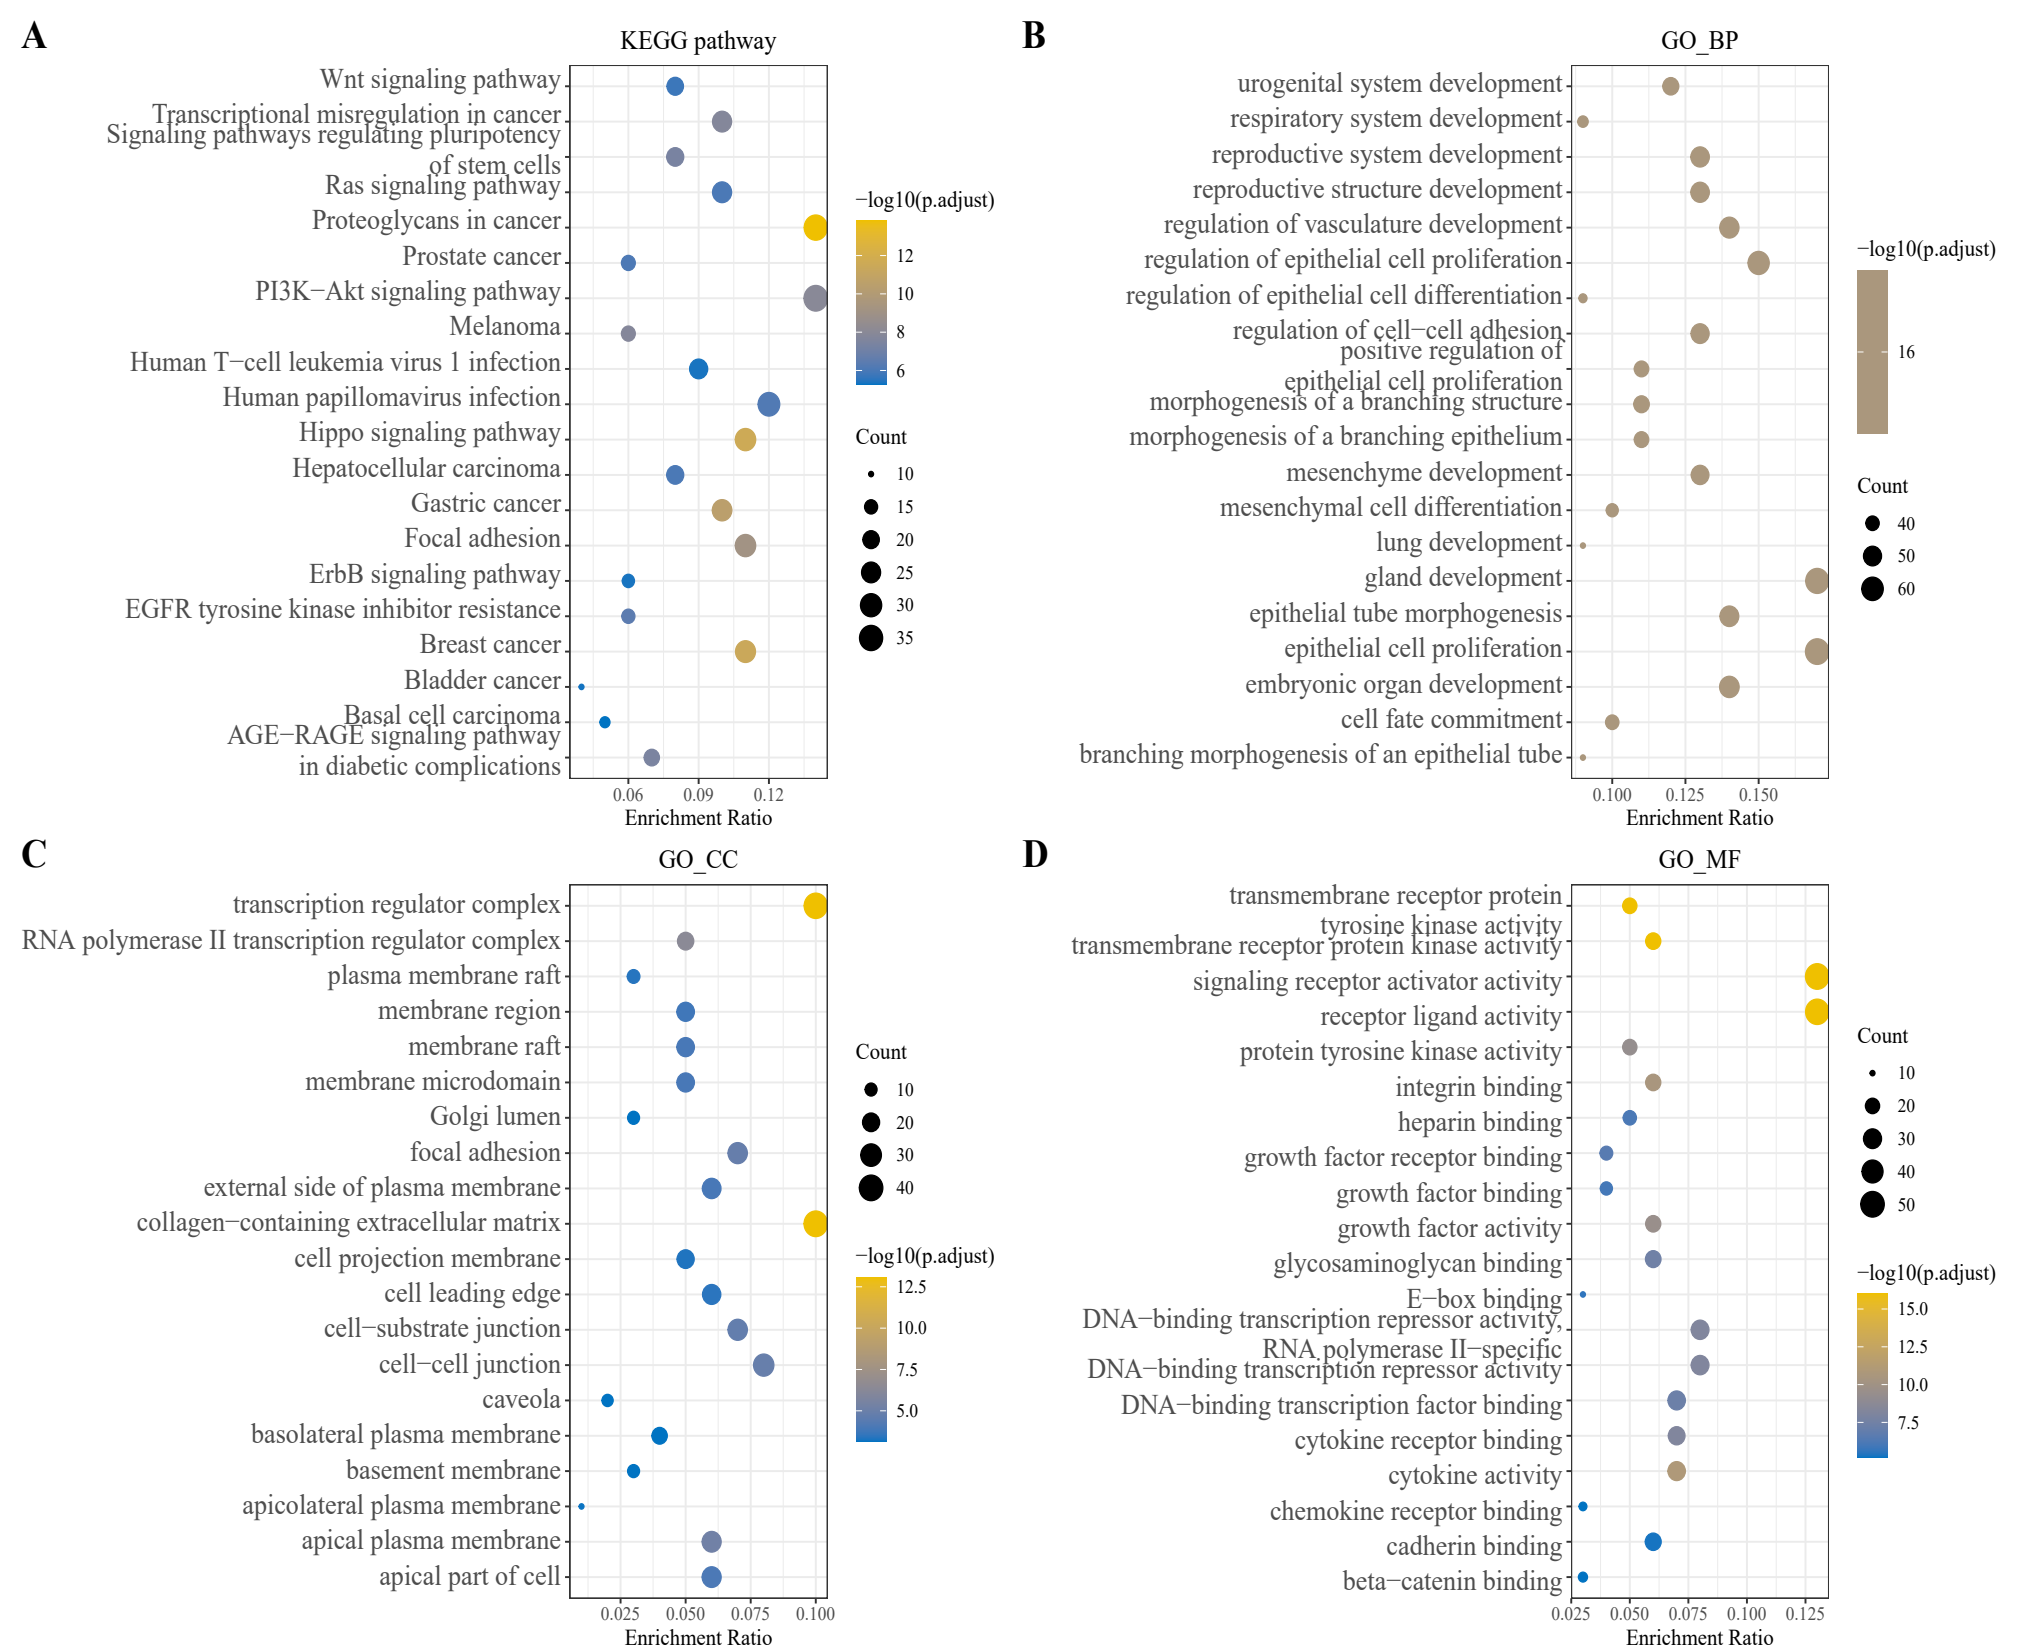

Figure S1

Functional enrichment analysis. A: KEGG enrichment analysis of EMT-related DEGs.

B: BP enrichment analysis of EMT-related DEGs. C: CC enrichment analysis of EMT-related DEGs. D: MF enrichment analysis of EMT-related DEGs.

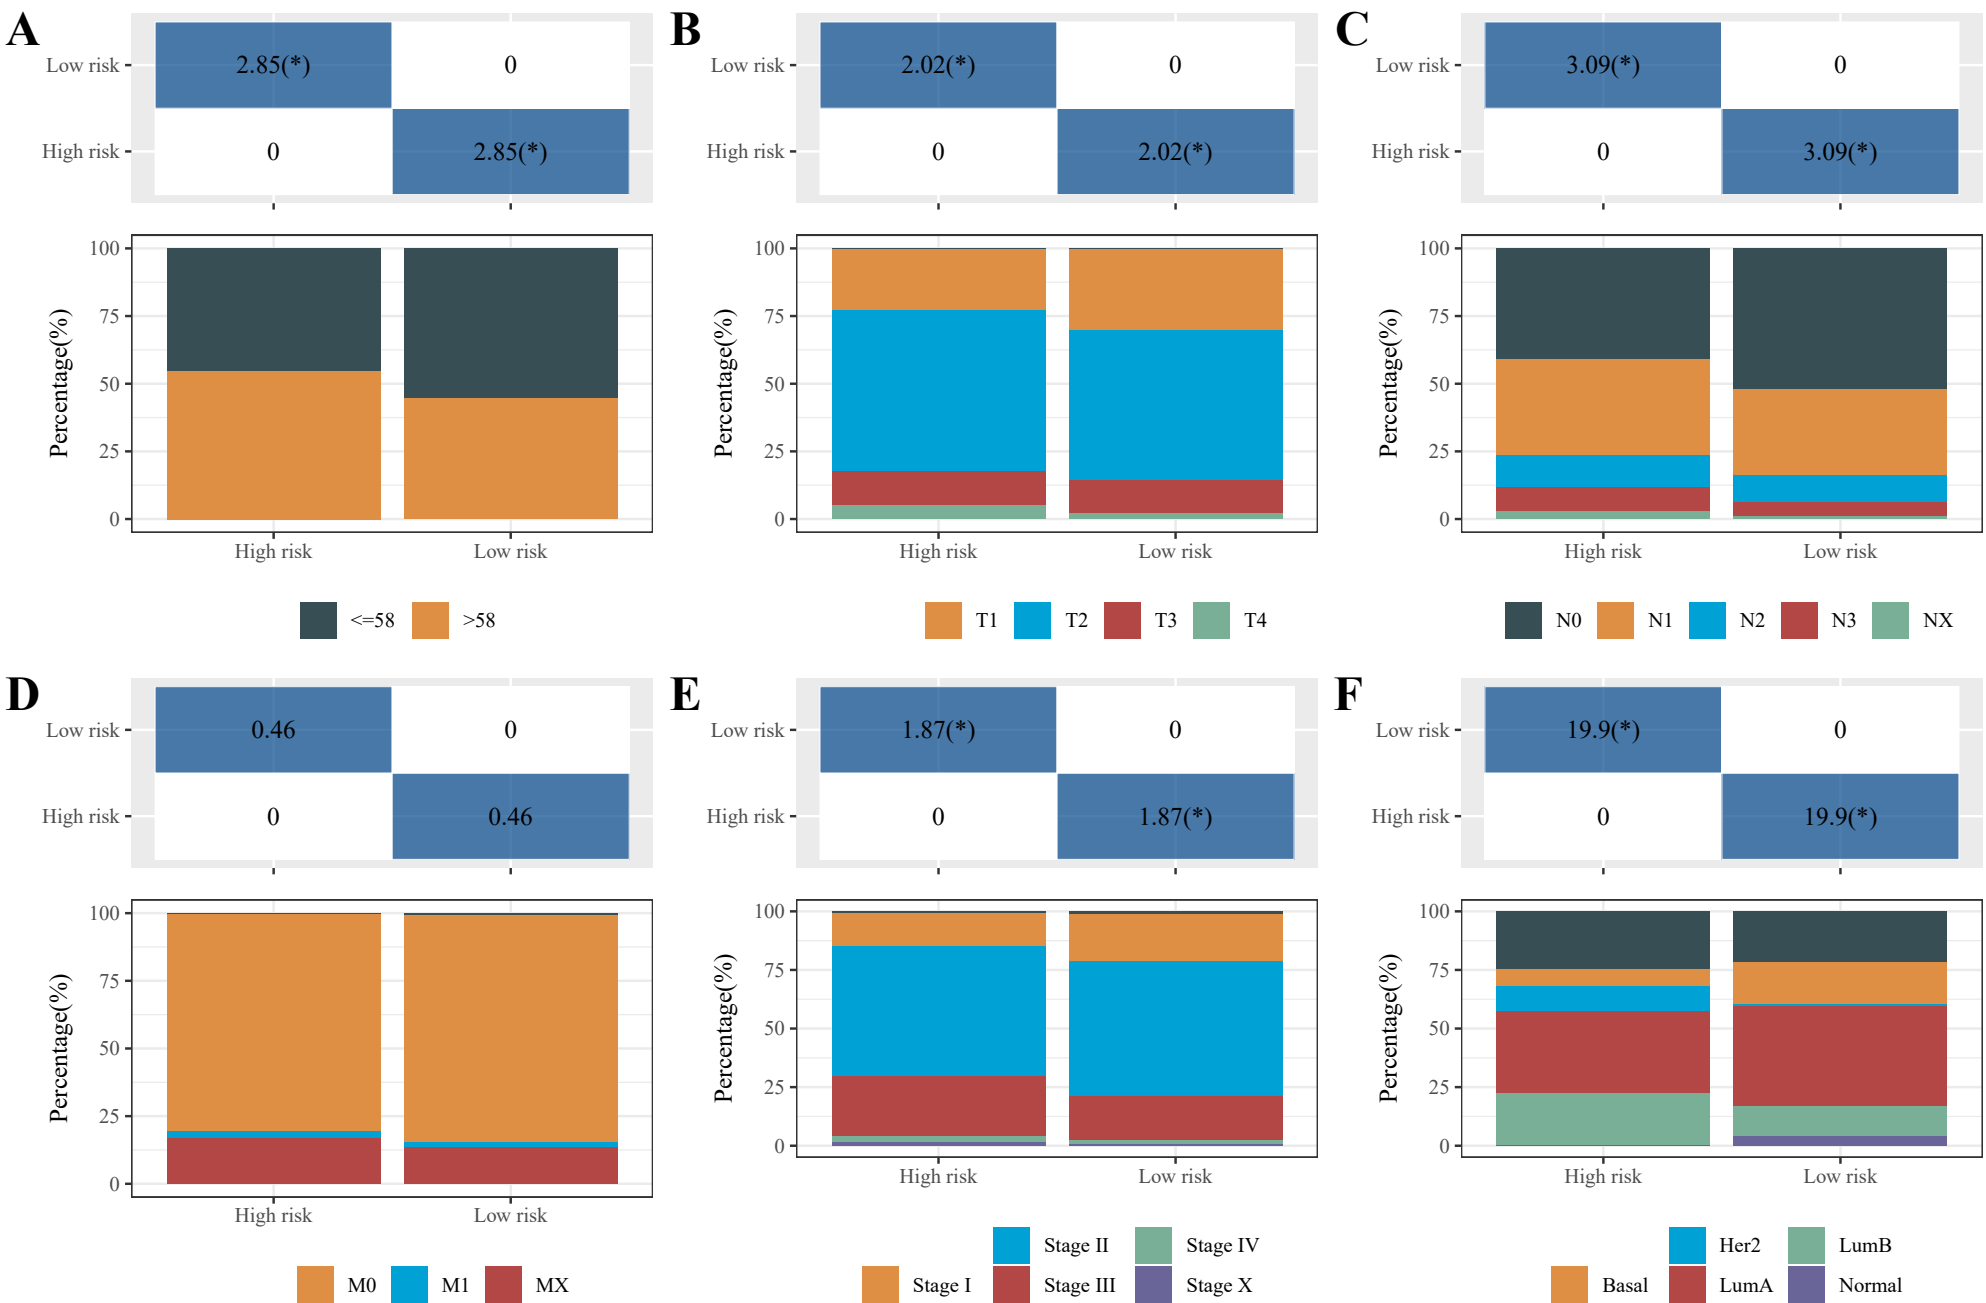

Figure S2

Distribution of clinical features, including Age (A), T stage (B), N stage (C), M stage (D), Stage s stage (E) and typical molecular subtypes of breast cancer (F) in High risk and Low risk group.

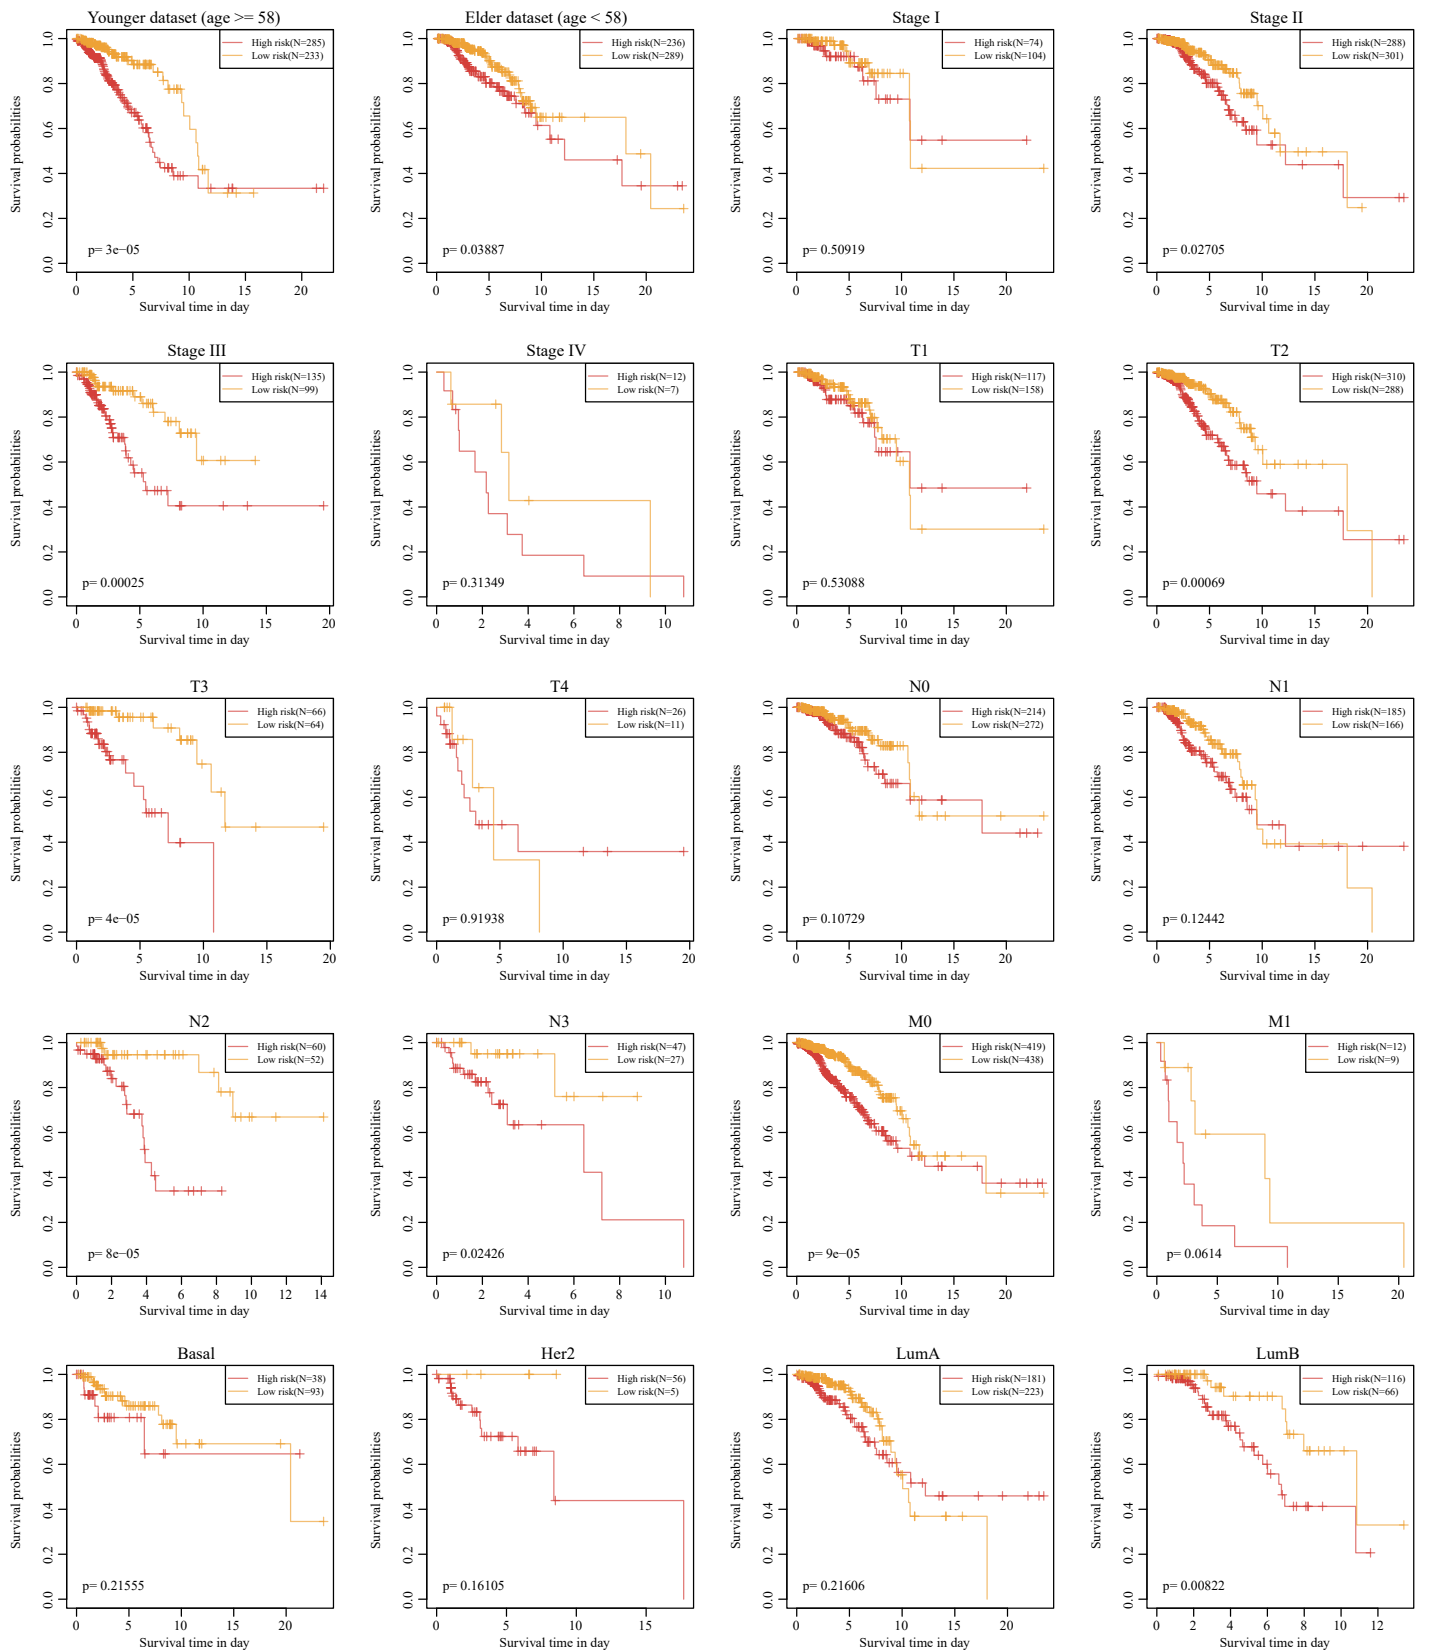

Figure S3

KM survival curve of patients in High Risk and Low Risk group divided into by clinical features.
